# Supplementary material for: 3-Dimensional Immunostaining and Automated Deep-Learning Based Analysis of Nerve Degeneration
Source: MDPI journal article supplement (doi:10.3390/ijms232314811), 2022-11-26

Supplemental Figure S1. Jaccard Index and Loss during BlebNet training

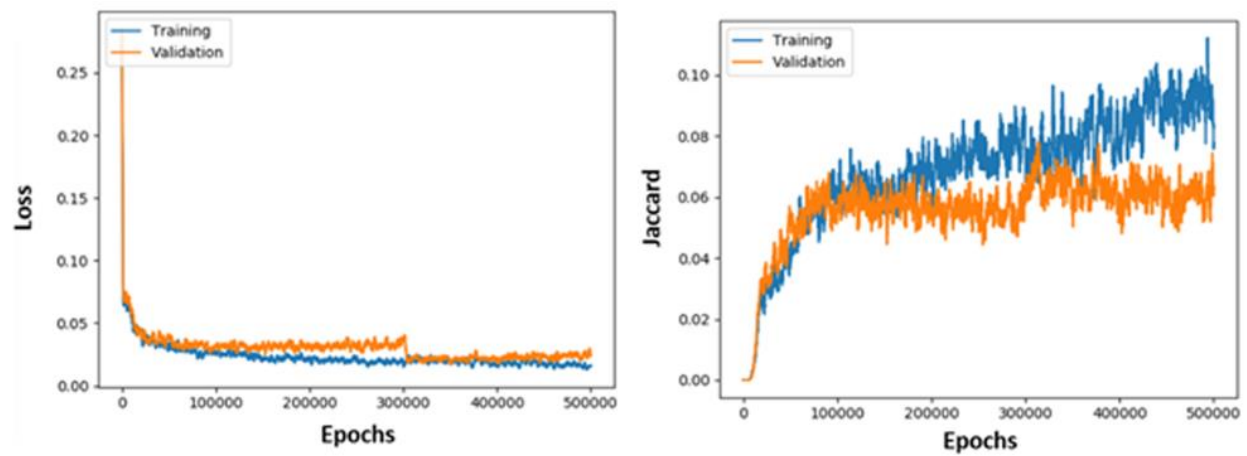

Supplemental Figure S2. Jaccard Index and Loss during BlebNet retraining

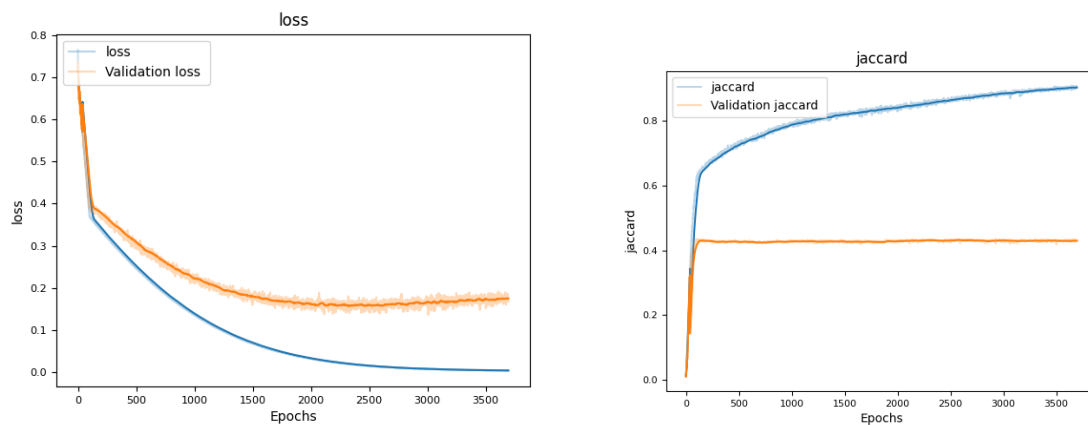

Supplement: s1 [file s1]
